# Supplementary material for: Synergistic catalysis for promoting selective C–C/C–O cleavage in plastic waste: structure–activity relationship and rational design of heterogeneous catalysts for liquid hydrocarbon production
Source: Royal Society of Chemistry journal article supplement (doi:10.1039/d4cc03261f), 2024-01-01
Supplement: d4cc03261f1.pdf [file d4cc03261f1.pdf]

## Supporting information

### **Synergistic catalysis for promoting selective C–C/C–O cleavage in plastic waste: Structure-activity relationship and rational design of heterogeneous catalysts for liquid hydrocarbon production**

Arjun K. Manal,<sup>#a</sup> Atal Shivhare,<sup>#a</sup> Sharad Lande,<sup>b</sup> and Rajendra Srivastava<sup>\*a</sup>

<sup>a</sup>Catalysis Research Laboratory, Department of Chemistry, Indian Institute of Technology Ropar, Rupnagar-140001, Punjab, India

<sup>b</sup>Research & Development, Reliance Industries Ltd. Thane Belapur Road, Ghansoli Navi Mumbai- 400701, India

**\*Corresponding Authors:** [rajendra@iitrpr.ac.in](mailto:rajendra@iitrpr.ac.in)

---

<sup>#</sup>*Equal contribution*

**Table S1.** C-C/C-O cleavage in aromatic plastic for selective arenes and cycloalkanes production

| Entry No. | Polymer                        | Catalyst                          | Reaction condition                                                                | Solvent                   | Product                                                  | Product yield (%) | Ref. |
|-----------|--------------------------------|-----------------------------------|-----------------------------------------------------------------------------------|---------------------------|----------------------------------------------------------|-------------------|------|
| 1.        | PET, PS, PPO, PC               | Ru/Nb <sub>2</sub> O <sub>5</sub> | 3.0 MPa H <sub>2</sub> , 280–320 °C, 8–16 h                                       | Water/<br>Octane          | Arenes                                                   | 75-85             | 24   |
| 2.        | PET                            | Ru/Nb <sub>2</sub> O <sub>5</sub> | 2.0 MPa N <sub>2</sub> , 220 °C, 20 bar N <sub>2</sub> , 12 h                     | Water                     | BTX                                                      | ~90               | 37   |
| 3.        | PC                             | Ru/Nb <sub>2</sub> O <sub>5</sub> | 0.07 MPa H <sub>2</sub> , 270 °C, 0.7 bar H <sub>2</sub> , 6 h                    | Hexane/<br>methanol       | Phenolics                                                | 80                | 42   |
| 4.        | PET                            | Cu/Na-SiO <sub>2</sub>            | 210 °C, 6 h                                                                       | Methanol                  | P-Xylene                                                 | 100               | 38   |
| 5.        | PET                            | Co/TiO <sub>2</sub>               | 3.0 MPa H <sub>2</sub> , 340 °C, 4 h                                              | Dodecane                  | BTX                                                      | ~72               | 40   |
| 6.        |                                |                                   |                                                                                   |                           |                                                          |                   |      |
| 7.        | PET                            | Ru/TiO <sub>2</sub>               | 3.0 MPa H <sub>2</sub> , 230 °C, 12 h                                             | Water                     | BTX                                                      | 77                | 43   |
| 8.        | PET                            | CoMo@NC                           | H <sub>2</sub> balloon, 260 °C, 10 h                                              | None                      | PTA                                                      | ~90               | 44   |
| 9.        | PC (Mw- 3.6 x10 <sup>4</sup> ) | Pt/C + H-Beta zeolite             | Methanolysis: 140- 200 °C, 3.5- 14 h;<br>HDO: 3.0 MPa H <sub>2</sub> , 100 °C, 1h | Methanol &<br>Cyclohexane | Low-density alkanes (C7-C8) & High-density alkanes (C15) | ~91               | 52   |
| 10.       | PC (Mw- 3.6 x10 <sup>4</sup> ) | Rh/C + USY                        | 3.5 MPa H <sub>2</sub> , 200 °C, 12 h                                             | Water                     | Propane-2,2-<br>diyldicyclohexane                        | ~95               | 53   |
| 11.       | PC                             | Raney Ni + USY                    | 1st step: 190°C, Raney Ni, 1 h                                                    | Isopropanol               | C6-C15 hydrocarbons                                      | ~75               | 54   |
| 12.       | PC                             | 1Ru0.5Ni/H-                       | 3.0 MPa H <sub>2</sub> , 180 °C, 10 h                                             | Decane                    | Propane-2,2-                                             | 97.3              | 55   |

|     |     |                                                           |                                                                                                                                                            |          |                                     |     |    |
|-----|-----|-----------------------------------------------------------|------------------------------------------------------------------------------------------------------------------------------------------------------------|----------|-------------------------------------|-----|----|
|     |     | Beta                                                      |                                                                                                                                                            |          | diyldicyclohexane                   |     |    |
| 13. | PET | Pt/C-<br>hydrogenation;<br>RuCu/SiO <sub>2</sub> -<br>HDO | Methanolysis: 140–200 °C, 3.5–14 h;<br>hydrogenation: 5.0 MPa H <sub>2</sub> , 80–160<br>°C 1–10 h;<br>HDO: 4.0 MPa H <sub>2</sub> , 350–400 °C, 8–22<br>h | Methanol | C7-C8 Cycloalkanes<br>and Aromatics | ~94 | 57 |

**Table S2.** C-C activation and cleavage in polyolefins for selective liquid hydrocarbon production.

| Entry No. | Polymer                                       | Catalyst                                       | Reaction conditions                                                     | Product                                                                                                                        | Product yield |            |            | Ref. |
|-----------|-----------------------------------------------|------------------------------------------------|-------------------------------------------------------------------------|--------------------------------------------------------------------------------------------------------------------------------|---------------|------------|------------|------|
|           |                                               |                                                |                                                                         |                                                                                                                                | Gas (%)       | Liquid (%) | Others (%) |      |
| 1.        | LDPE<br>( $M_n$ : ~1700 Da, $M_w$ : ~4000 Da) | Ru/ZrO <sub>2</sub><br>(ZrO <sub>2</sub> -800) | 6.0 MPa H <sub>2</sub> , 240 °C, 2 h.                                   | Gas (C <sub>1</sub> -C <sub>4</sub> )<br>Liquid(C <sub>5</sub> -C <sub>21</sub> )<br>Other (C <sub>22</sub> -C <sub>45</sub> ) | ~11           | ~84        | ~4         | 67   |
| 2.        | PE, PP, LDPE                                  | Ru/CeO <sub>2</sub>                            | 2.5-3.5 MPa H <sub>2</sub> ,<br>200–240 °C, H <sub>2</sub> ,<br>8–144 h | Gas (C <sub>1</sub> -C <sub>4</sub> )<br>Liquid(C <sub>5</sub> -C <sub>26</sub> )<br>solid (C <sub>27</sub> <sup>+</sup> )     | ~10           | ~25-45     | 35- 40     | 69   |
| 3.        | LDPE ( $M_n$ : ~ 1,7000, $M_w$ : ~ 4,000)     | Ru/CeO <sub>2</sub>                            | 6 MPa H <sub>2</sub> ,<br>240 °C, H <sub>2</sub> , 5 h                  | Gas (C <sub>1</sub> -C <sub>4</sub> )<br>Liquid(C <sub>5</sub> -C <sub>26</sub> )<br>Wax (C <sub>27</sub> <sup>+</sup> )       | 31            | 54         | 15         | 70   |
| 4.        | LDPE ( $M_n$ : ~ 1,7000, $M_w$ : ~ 4,000)     | Ru/CeO <sub>2</sub>                            | 2.0 MPa H <sub>2</sub> ,<br>240 °C, H <sub>2</sub> , 4 h                | Gas (C <sub>1</sub> -C <sub>4</sub> )<br>Liquid(C <sub>5</sub> -C <sub>21</sub> )<br>Solid (C <sub>22</sub> <sup>+</sup> )     | 29.4          | 56.8       | 13.8       | 71   |
| 5.        | LDPE ( $M_n$ : ~ 1,7000, $M_w$ : ~ 4,000 Da)  | Ru/CeO <sub>2</sub> -O                         | 3.0 MPa H <sub>2</sub> ,<br>240 °C, H <sub>2</sub> , 8 h                | Gas (C <sub>1</sub> -C <sub>4</sub> )<br>Liquid(C <sub>5</sub> -C <sub>36</sub> )                                              | ~5.0          | ~ 80.0     | --         | 72   |
| 6.        | LDPE ( $M_w$ =76000 Da)                       | Ru/WZrO <sub>x</sub>                           | 5.0 MPa H <sub>2</sub> , 250                                            |                                                                                                                                | ~18           | ~73        | ~9         | 73   |

|     |                                                                         |                                        |                                                |                                                                                                                            |       |       |     |    |
|-----|-------------------------------------------------------------------------|----------------------------------------|------------------------------------------------|----------------------------------------------------------------------------------------------------------------------------|-------|-------|-----|----|
|     |                                                                         |                                        | °C, 2h, in hexane                              |                                                                                                                            |       |       |     |    |
| 7.  | PE Mw: ( $M_n$ : ~1700 Da, $M_w$ : ~4000 Da)                            | 5 % Ru/C                               | 2-3 MPa H <sub>2</sub> , 200–225 °C, 2–16 h    | Gas (C <sub>1</sub> -C <sub>5</sub> )<br>Liquid(C <sub>5</sub> -C <sub>32</sub> )                                          | ~12   | ~70   | -   | 75 |
| 8.  | PE ( $M_n$ : 8000–158,000 Da) and used plastic bag ( $M_n$ : 31,000 Da) | Pt/SrTiO <sub>3</sub>                  | 1.2 MPa H <sub>2</sub> , 300 °C, 96 h          | narrowly-ranged lubricants                                                                                                 | ~13   | ~85   | -   | 78 |
| 9.  | HDPE                                                                    | 5 % Ru/C                               | 3.0 MPa H <sub>2</sub> , 220 °C, 1h, in hexane | Liquid(C <sub>5</sub> -C <sub>22</sub> )<br>other (C <sub>20</sub> <sup>+</sup> )                                          | -     | ~75   | -   | 76 |
| 10. | HDPE ( $M_w$ : 82600 Da)                                                | mSiO <sub>2</sub> /Pt/SiO <sub>2</sub> | 1.7 MPa H <sub>2</sub> , 300 °C, 15 h          | Gas (C <sub>1</sub> -C <sub>4</sub> )<br>Liquid(C <sub>5</sub> -C <sub>29</sub> )<br>Waxes (C <sub>30</sub> <sup>+</sup> ) | ~12.4 | ~74   | ~14 | 81 |
| 11. | LDPE                                                                    | Pt@Si-1 + H-Beta                       | 3.0 MPa H <sub>2</sub> , 250 °C,               | Gas (C <sub>1</sub> -C <sub>4</sub> )<br>Liquid(C <sub>5</sub> -C <sub>9</sub> )                                           | ~10 % | ~90 % | -   | 82 |
| 12. | PE, ( $M_w$ : 4000 Da),<br>PP ( $M_w$ : 12000 Da)                       | 5 % Co/ZSM-5                           | 4.0 MPa H <sub>2</sub> , 250 °C, 20 h,         | C <sub>2</sub> -C <sub>4</sub> hydrocarbon                                                                                 | ~88 % | ~11 % | -   | 83 |
| 13. | LDPE ( $M_w$ ~4000 Da),                                                 | Ni/SiO <sub>2</sub>                    | 3.0 MPa H <sub>2</sub> ,<br>300 °C, 2 h        | Gas (C <sub>1</sub> -C <sub>4</sub> )<br>Liquid(C <sub>5</sub> -C <sub>26</sub> )<br>solid (C <sub>27</sub> <sup>+</sup> ) | ~14   | ~65   | ~22 | 84 |

|     |                                                                                                          |                                           |                                          |                                                                                                                      |       |       |     |     |
|-----|----------------------------------------------------------------------------------------------------------|-------------------------------------------|------------------------------------------|----------------------------------------------------------------------------------------------------------------------|-------|-------|-----|-----|
| 14. | LLDPE                                                                                                    | Rh/Nb <sub>2</sub> O <sub>5</sub>         | 3.0 MPa H <sub>2</sub> , 300 °C, 6 h     | Liquid(C <sub>5</sub> -C <sub>20</sub> ), Squalene                                                                   | -     | ~85 % | 15  | 122 |
| 15. | i-PP (M <sub>w</sub> ~ 250 000, average M <sub>n</sub> ~ 67 000)                                         | 5.9 % Ru/TiO <sub>2</sub>                 | 3.0 MPa H <sub>2</sub> , 250 °C, 16 h    | Lubricant                                                                                                            | ~28 % | ~65 % | 6.4 | 86  |
| 16. | LDPE                                                                                                     | Pt <sub>3</sub> /SZ                       | H <sub>2</sub> 20 mL/min, 250 °C,        | Gas (C <sub>1</sub> -C <sub>4</sub> )<br>Liquid(C <sub>5</sub> -C <sub>12</sub> )                                    | ~25 % | ~74 % | -   | 86  |
| 17. | LDPE (M <sub>w</sub> : 250,000 Da), HDPE, (M <sub>w</sub> : 250,000 Da), PS (M <sub>w</sub> : 35,000 Da) | Pt/WO <sub>3</sub> /ZrO <sub>2</sub> + HY | 3.0 MPa H <sub>2</sub> , 250 °C.         | Diesel, jet, and gasoline-range hydrocarbons                                                                         | ~34%  | ~65 % | -   | 87  |
| 18. | LDPE (M <sub>w</sub> ~ 150 000 g/mol)                                                                    | Pt/H-Beta                                 | 0.5-2.0 MPa H <sub>2</sub> , 300-330 °C, | Low molecular weight hydrocarbons                                                                                    | ~39 % | ~60 % | -   | 88  |
| 19. | PE (M <sub>w</sub> : 4000 Da)                                                                            | 5 % Ru/FAU                                | 3.0 MPa H <sub>2</sub> , 200 °C, 16 h,   | Gas (C <sub>1</sub> -C <sub>4</sub> )<br>Liquid(C <sub>5</sub> -C <sub>12</sub> )                                    | ~40 % | ~60 % | -   | 89  |
| 20. | n-hexadecane (as model substrate) and PE                                                                 | 2.5 % Ru/HZSM-5                           | 4.5 MPa H <sub>2</sub> , 375 °C, for 2 h | C <sub>1</sub> -C <sub>4</sub> hydrocarbons                                                                          | ~91 % | -     | ~10 | 90  |
| 21. | HDPE (M <sub>w</sub> :125,000 g/cm <sup>3</sup> )                                                        | Sulfide Ni/H-SiAl                         | 6.8 MPa H <sub>2</sub> , 375 °C, 60 min  | Gas products (C <sub>1</sub> -C <sub>4</sub> Hydrocarbons)<br>Oil products (C <sub>5</sub> -C <sub>12</sub> hydroca) | ~53%  | ~40 % | ~5  | 91  |

|     |      |                            |                                      |                   |       |       |   |    |
|-----|------|----------------------------|--------------------------------------|-------------------|-------|-------|---|----|
| 22. | HDPE | Meso-beta-silica composite | 2.0 MPa H <sub>2</sub> , 360-400 °C, | Gas & Liquid fuel | ~40 % | ~60 % | - | 92 |
|-----|------|----------------------------|--------------------------------------|-------------------|-------|-------|---|----|
